# Supplementary material
Source: publisher figshare collection journal article supplement (https://karger.figshare.com/ndownloader/files/8956759)
Supplement: Supplementary file 1 [file 8956759]

## Erratum

---

In the article by Selby et al., entitled ‘Design and rationale of ‘tackling acute kidney injury’, a multicentre quality improvement study’ [Nephron 2016;134:200–204, DOI: 10.1159/000447675], the following acknowledgement needs to be added: The authors gratefully acknowledge the contribution of Eileen McDonach in the design and production of the qualitative evaluation plan.
